# Supplementary material for: Volatile Fatty Acids Production by Acidogenic Fermentation of Wastewater: A Bibliometric Analysis
Source: MDPI journal article supplement (doi:10.3390/su15032370), 2023-01-28
Supplement: s1 [file s1]

Archive with 1 entries (1 files):
- sustainability-2159205-supplementary.pdf
